# Supplementary material for: A Pilot Study on the 1H-NMR Serum Metabolic Profile of Takotsubo Patients Reveals Systemic Response to Oxidative Stress
Source: MDPI journal article supplement (doi:10.3390/antiox10121982), 2021-12-13
Supplement: s1 [file s1]

**Table S1.** List of the 53 metabolites and total amino acid concentration measured in control and TTS groups. The chemical shifts used for the quantification and the median, interquartile range (IQR), and the number of spectra in which each metabolite was quantified (N) are shown.

| Metabolite             | $\delta$<br>[ppm] <sup>a</sup> | Controls<br>Median [ $\mu$ M] (IQR), N | Takotsubo<br>Median [ $\mu$ M] (IQR), N |
|------------------------|--------------------------------|----------------------------------------|-----------------------------------------|
| 2-Aminobutyrate        | 1.0                            | 24 (14-26), 10                         | 30 (25-34), 10                          |
| 2-Hydroxybutyrate      | 0.9                            | 45 (41-45), 10                         | 141 (106-166), 10                       |
| 2-Hydroxyisovalerate   | 0.8                            | 6 (5-7), 9                             | 10 (7-12), 10                           |
| 2-Oxoglutarate         | 3.0                            | 14 (12-16), 10                         | 21 (15-26), 8                           |
| 2-Oxoisocaproate       | 2.6                            | 5 (4-7), 10                            | 14 (11-16), 10                          |
| 3-Hydroxybutyrate      | 1.2                            | 33 (29-58), 10                         | 655 (326-1324), 10                      |
| 3-Hydroxyisobutyrate   | 1.1                            | 16 (16-18), 10                         | 24 (19-31), 10                          |
| 3-Hydroxyisovalerate   | 1.3                            | 1 (1-2), 9                             | 3 (2-3), 10                             |
| 3-Methyl-2-oxovalerate | 1.1                            | 6 (6-7), 9                             | 12 (10-13), 10                          |
| Acetate                | 1.9                            | 60 (51-87), 10                         | 73 (47-152), 9                          |
| Acetoacetate           | 2.3                            | 22 (18-37), 10                         | 369 (126-559), 10                       |
| Acetyl-L-carnitine     | 3.2                            | 8 (6-8), 10                            | 17 (7-18), 9                            |
| Alanine                | 1.5                            | 391 (354-534), 10                      | 259 (234-366), 10                       |
| Arginine               | 1.6                            | 69 (64-79), 10                         | 42 (35-54), 10                          |
| Asparagine             | 2.8; 2.9                       | 59 (56-66), 10                         | 44 (36-61), 10                          |
| Betaine                | 3.9                            | 30 (27-44), 10                         | 26 (26-34), 7                           |
| Choline                | 3.2                            | 11 (9-12), 10                          | 10 (8-12), 8                            |
| Citrate                | 2.7                            | 116 (95-138), 10                       | 80 (29-125), 10                         |
| Citrulline             | 1.5                            | 42 (37-57), 10                         | 34 (23-44), 10                          |
| Creatine               | 3.0; 3.9                       | 49 (42-56), 10                         | 87 (57-96), 8                           |
| Creatinine             | 3.0; 4.0                       | 77 (74-84), 10                         | 83 (79-86), 8                           |
| Cystine                | 4.1; 3.2                       | 53 (43-55), 9                          | 52 (44-59), 8                           |
| Dimethyl sulfone       | 3.1                            | 10 (7-11), 10                          | 8 (6-14), 7                             |
| Dimethylamine          | 2.7                            | 2 (1-2), 10                            | 2 (2-3), 9                              |
| Formate                | 8.4                            | 51 (42-55), 10                         | 40 (32-55), 10                          |
| Glucose                | 3.9; 3.5                       | 5370 (5125-5755), 10                   | 6280 (5509-7162), 10                    |
| Glutamate              | 2.3                            | 37 (29-60), 10                         | 82 (62-92), 10                          |
| Glutamine <sup>b</sup> | 2.5                            | 715 (699-791), 10                      | 560 (519-620), 10                       |
| Glycerol               | 3.6; 3.6                       | 257 (223-297), 10                      | 544 (349-603), 6                        |
| Glycine                | 3.5                            | 294 (277-314), 10                      | 249 (220-279), 6                        |
| Histidine              | 7.1                            | 95 (90-104), 10                        | 70 (54-74), 10                          |
| Hypoxanthine           | 8.2; 8.2                       | 7 (5-8), 8                             | 5 (4-6), 9                              |
| Isoleucine             | 1.0                            | 61 (57-68), 10                         | 63 (61-70), 10                          |
| L-Carnitine            | 3.2                            | 47 (40-51), 10                         | 42 (32-46), 8                           |
| Lactate                | 1.3                            | 2533 (2393-3437), 10                   | 1988 (1458-2443), 10                    |
| Leucine                | 1.0; 0.9                       | 127 (126-133), 10                      | 131 (111-144), 10                       |
| Lysine                 | 3.0                            | 212 (188-224), 10                      | 126 (120-147), 10                       |
| Methionine             | 2.6                            | 32 (29-34), 10                         | 26 (21-30), 10                          |
| myo-Inositol           | 4.1; 3.6; 3.3                  | 29 (24-33), 10                         | 42 (31-60), 6                           |
| N,N-Dimethylglycine    | 2.0                            | 3 (2-5), 10                            | 4 (3-5), 9                              |
| Ornithine              | 3.0                            | 85 (71-107), 10                        | 49 (41-50), 10                          |
| Phenylalanine          | 7.4; 7.4; 7.3                  | 56 (55-63), 10                         | 58 (51-65), 10                          |
| Proline                | 3.3                            | 230 (218-235), 10                      | 178 (151-247), 10                       |
| Pyruvate               | 2.4                            | 84 (67-122), 10                        | 113 (77-164), 10                        |
| Serine                 | 3.9                            | 134 (128-142), 10                      | 108 (92-131), 7                         |
| Succinate              | 2.4                            | 7 (7-8), 10                            | 12 (9-17), 10                           |

|                                      |          |                      |                      |
|--------------------------------------|----------|----------------------|----------------------|
| <b>Threonine</b>                     | 4.2; 3.6 | 142 (139-183), 10    | 89 (70-116), 10      |
| <b>Trimethylamine N-oxide</b>        | 3.3      | 15 (14-19), 10       | 7 (6-14), 7          |
| <b>Tryptophan (free)<sup>c</sup></b> | 7.7; 7.5 | 6 (5-8), 9           | 8 (7-10), 9          |
| <b>Tyrosine</b>                      | 7.2      | 85 (83-91), 10       | 61 (58-68), 10       |
| <b>Urea</b>                          | 5.8      | 1667 (1370-1973), 10 | 2086 (1654-2888), 10 |
| <b>Uridine</b>                       | 5.9      | 5 (5-6), 8           | 4 (3-5), 7           |
| <b>Valine</b>                        | 1.0      | 267 (250-302), 10    | 238 (213-271), 10    |
| <b>Total amino acids</b>             | -        | 3147 (3061-3332), 10 | 2450 (2273-2497), 10 |

<sup>a</sup> chemical shifts refer to TSP signal at 25°C.

<sup>b</sup>Sum of glutamine and pyroglutamate (see Materials and Methods)

<sup>c</sup> values of the fraction unbound of tryptophan

**Table S2.** Median and interquartile range (IQR) for control and TTS groups of the calculated ratios. AcAc/3HB: acetoacetate/3-hydroxybutyrate; ALCAR/CAR: acetyl-L-carnitine/L-carnitine; Phe/Tyr: phenylalanine/tyrosine.

| <b>Metabolite</b> | <b>Controls<br/>Median (IQR)</b> | <b>Takotsubo<br/>Median (IQR)</b> |
|-------------------|----------------------------------|-----------------------------------|
| <b>AcAc/3HB</b>   | 0.62 (0.54-0.75)                 | 0.46 (0.41-0.49)                  |
| <b>ALCAR/CAR</b>  | 0.17 (0.13-0.18)                 | 0.37 (0.2-0.53)                   |
| <b>Phe/Tyr</b>    | 0.69 (0.65-0.71)                 | 0.96 (0.86-1.02)                  |

**Table S3.** Fold changes, statistical parameters, and minimum sample size of the metabolites contributing to the separation between the TTS and control metabolic profiles. AcAc/3HB: acetoacetate/3-hydroxybutyrate; ALCAR/CAR: acetyl-L-carnitine/L-carnitine; Phe/Tyr: phenylalanine/tyrosine; Total AAs: total amino acids concentration.

| Metabolic class                             | Metabolite             | FC    | p-value | AUC  | VIP  | Minimum Sample size |
|---------------------------------------------|------------------------|-------|---------|------|------|---------------------|
| <b>Amino acids</b>                          | Alanine                | -0.31 | <0.01   | 0.84 | 1.07 | 13                  |
|                                             | Arginine               | -0.31 | <0.01   | 0.80 | 1.10 | 12                  |
|                                             | Asparagine             | -0.14 | 0.04    | 0.68 | 0.96 | 21                  |
|                                             | Glutamate              | 0.87  | <0.01   | 0.88 | 1.21 | 12                  |
|                                             | Glutamine*             | -0.13 | <0.01   | 0.75 | 1.02 | 15                  |
|                                             | Histidine              | -0.28 | <0.01   | 0.90 | 1.49 | 7                   |
|                                             | Lysine                 | -0.31 | <0.01   | 0.89 | 1.63 | 6                   |
|                                             | Methionine             | -0.13 | 0.02    | 0.65 | 1.03 | 18                  |
|                                             | Ornithine              | -0.43 | <0.01   | 0.79 | 1.52 | 9                   |
|                                             | Threonine              | -0.40 | <0.01   | 0.79 | 1.34 | 9                   |
|                                             | Tyrosine               | -0.23 | <0.01   | 0.76 | 1.51 | 9                   |
|                                             | Valine                 | -0.11 | 0.04    | 0.55 | 0.93 | 23                  |
|                                             | Total amino acids      | -0.20 | <0.01   | 0.78 | 1.61 | 6                   |
|                                             | Phe/Tyr                | 0.36  | <0.01   | 0.94 | 1.49 | 10                  |
| <b>BCAA metabolism</b>                      | 2-Hydroxyisovalerate   | 0.80  | 0.03    | 0.82 | 0.90 | 20                  |
|                                             | 2-Oxoisocaproate       | 1.96  | <0.01   | 1.00 | 1.48 | 9                   |
|                                             | 3-Hydroxyisobutyrate   | 0.55  | 0.02    | 0.85 | 1.03 | 18                  |
|                                             | 3-Hydroxyisovalerate   | 0.67  | <0.01   | 0.85 | 1.11 | 15                  |
|                                             | 3-Methyl-2-oxovalerate | 1.11  | <0.01   | 0.98 | 1.71 | 6                   |
| <b>Fatty acid metabolism</b>                | ALCAR/CAR              | 1.53  | 0.02    | 0.65 | 0.98 | 17                  |
| <b>Glycerophospholipid metabolism</b>       | Glycerol               | 0.74  | 0.03    | 0.55 | 1.31 | 13                  |
| <b>Gut microbiota product</b>               | Trimethylamine N-oxide | -0.36 | 0.03    | 0.82 | 1.28 | 14                  |
| <b>Ketone bodies</b>                        | 3-Hydroxybutyrate      | 20.4  | 0.02    | 0.96 | 1.49 | 15                  |
|                                             | Acetoacetate           | 14.0  | <0.01   | 0.96 | 1.44 | 12                  |
|                                             | AcAc/3HB               | -0.27 | <0.01   | 0.81 | 1.15 | 14                  |
| <b>Met, Cys, SAM and Taurine metabolism</b> | 2-Aminobutyrate        | 0.66  | 0.03    | 0.80 | 0.82 | 22                  |
|                                             | 2-Hydroxybutyrate      | 2.61  | <0.01   | 1.00 | 1.64 | 8                   |
| <b>Nucleoside metabolism</b>                | Uridine                | -0.22 | 0.12    | 0.67 | 1.01 | 29                  |

\*Sum of glutamine and pyroglutamate (see Materials and Methods)

**Table S4.** Metabolites showing the highest correlation with LVEF%.

| Metabolite             | Pearson <i>r</i> | p-value |
|------------------------|------------------|---------|
| Lysine                 | 0.87             | < 0.01  |
| Histidine              | 0.83             | < 0.01  |
| Tyrosine               | 0.78             | < 0.01  |
| Methionine             | 0.73             | < 0.01  |
| Alanine                | 0.64             | < 0.01  |
| Threonine              | 0.63             | < 0.01  |
| Glutamine              | 0.58             | < 0.05  |
| Asparagine             | 0.52             | < 0.05  |
| 2-Oxoglutarate         | -0.53            | < 0.05  |
| 2-Oxoisocaproate       | -0.61            | < 0.01  |
| 2-Hydroxybutyrate      | -0.61            | < 0.01  |
| Myo-inositol           | -0.71            | < 0.01  |
| Urea                   | -0.71            | < 0.01  |
| 3-Methyl-2-oxovalerate | -0.75            | < 0.01  |
